# Supplementary material
Source: publisher figshare collection journal article supplement (https://sage.figshare.com/ndownloader/files/17773286)
Supplement: Supplementary file 1 [file 17773286]

**SUPPLEMENTAL TABLES**

**Table S1. Coding definitions for kidney transplant recipient demographic and comorbid conditions**

| <b>Characteristic</b>                                              | <b>Database</b> | <b>Codes Used</b>                                                                                                                                                                                                                                                                                                                                                                                                                 |
|--------------------------------------------------------------------|-----------------|-----------------------------------------------------------------------------------------------------------------------------------------------------------------------------------------------------------------------------------------------------------------------------------------------------------------------------------------------------------------------------------------------------------------------------------|
| <b>Baseline Characteristic of Transplant Recipients and Donors</b> |                 |                                                                                                                                                                                                                                                                                                                                                                                                                                   |
| Age, Sex, Rural                                                    | RPDB            |                                                                                                                                                                                                                                                                                                                                                                                                                                   |
| Renal Transplant                                                   | CORR            | Treatment_Code: 171<br>Transplanted_Organ_Type_Code[1-3]: 10, 11, 12, 18, 19                                                                                                                                                                                                                                                                                                                                                      |
| Date of transplant,                                                | CORR            | Treatment_date                                                                                                                                                                                                                                                                                                                                                                                                                    |
| Cause of primary renal disease                                     | CORR            | Glomerulonephritis/Auto-immune disease: 05, 06, 07, 08, 09, 10, 11, 12, 13, 14, 15, 16, 17, 19, 73, 74, 84, 85, 86, 88<br>Diabetes: 80, 81<br>Cystic kidney disease: 40, 41, 42, 43, 49<br>Renal vascular disease: 70, 71, 72, 79<br>Other: 20, 21, 22, 23, 24, 25, 29, 30, 31, 32, 33, 39, 50, 51, 52, 53, 54, 55, 56, 57, 58, 59, 60, 61, 62, 63, 66, 78, 82, 83, 87, 89, 90, 91, 92, 93, 94, 95, 96, 97, 99<br>Unknown: 00, 98 |
| Race                                                               | CORR            | Caucasian: 01;<br>Asian: 02;<br>African-American: 03;<br>Indian: 05<br>Other: 08, 09, 10, 11, 99<br>Unknown: 98                                                                                                                                                                                                                                                                                                                   |
| Body Mass Index                                                    | CORR            | Initial_Height<br>Initial_Weight                                                                                                                                                                                                                                                                                                                                                                                                  |
| Dialysis modality                                                  | CORR            | Hemodialysis: 111, 112, 113, 121, 122, 123, 131, 132, 133, 211, 221, 231, 311, 312, 313, 321, 322, 323, 331, 332, 333, 413, 423, 433,<br>Peritoneal Dialysis:141, 151, 152, 241, 242, 251, 252, 443, 453<br>Other – 060                                                                                                                                                                                                           |
| Preemptive                                                         | CORR            |                                                                                                                                                                                                                                                                                                                                                                                                                                   |
| Time on dialysis                                                   | CORR            | TRANSPLANT ([Treatment_Date] & [Treatment_Code]) – DIALYSIS ([Treatment Date] & [Treatment_Code])                                                                                                                                                                                                                                                                                                                                 |
| Donor source                                                       | CORR            | Living: 02, 03, 04, 05, 06, 07, 10, 12, 15<br>Deceased: 01<br>Unknown/Out-of-country transplant: 98                                                                                                                                                                                                                                                                                                                               |
| Charlson Comorbidity Index                                         | CIHI-DAD        | Charlson Macro                                                                                                                                                                                                                                                                                                                                                                                                                    |
| Peak Panel Reactive Antibody                                       | CORR            | PRA_1_PEAK_RESULT CORR                                                                                                                                                                                                                                                                                                                                                                                                            |
| Transplant Centre                                                  | CORR            | TREATMENT_FACILITY_NUM                                                                                                                                                                                                                                                                                                                                                                                                            |

### Coding Definitions for Renal Recipient Outcomes

| OUTCOMES                 | Database                             | Codes Used                                                                                                                                                                                                                                              |
|--------------------------|--------------------------------------|---------------------------------------------------------------------------------------------------------------------------------------------------------------------------------------------------------------------------------------------------------|
| Death                    | RPDB                                 |                                                                                                                                                                                                                                                         |
| Dialysis post transplant | CIHI-DAD/OHIP<br><br>CORR<br>CHRONIC | CCP: 5195, 6698<br>CCI: 1PZ21<br>OHIP fee: R849, G323, G325, G326, G860, G863, G866, G330, G331, G332, G861, G082, G083, G085, G090, G091, G092, G093, G094, G095, G096, G294, G295<br>111,112,113,121,122,123,131,132,133,211,221,231,311,312,313,321, |
| Repeat kidney transplant | CORR<br>CHRONIC                      | Treatment_Code: 171<br>Transplanted_Organ_Type_Code[1-3]: 10, 11, 12, 18, 19                                                                                                                                                                            |

Abbreviations: RPDB: Registered Person's database, CORR: Canadian Organ Reporting Register, CIHI: Canadian Institute for Health information, DAD: Discharge abstract database, CCP; Canadian Classification of Diagnostic Therapeutic and Surgical Procedures, CCI; Canadian Classification of Interventions TIA: thrombotic ischemic stroke.

**Figure S1. Cohort Creation**

**Total kidney transplants in  
Ontario 2000-2013**

**N= 6783**

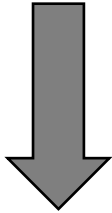

**EXCLUSION CRITERIA (N=1746):**

Invalid IKN = 353

Prior transplant = 671

Multi-organ = 313

Non-Ontario, death date before transplant date or  
missing data on age/sex =14

<18 or transplanted at Children's Hospital = 223

Transplant billings or admission dates do not align  
with transplant date = 117

Transplanted the one centre with smaller volume over  
the study period =55

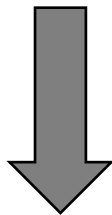

**STUDY COHORT**

**N= 5037**
